# Supplementary material for: Genetic and systems level analysis of Drosophila sticky/citron kinase and dFmr1 mutants reveals common regulation of genetic networks
Source: PubMed Central journal article supplement (PMC2610033; doi:10.1186/1752-0509-2-101), 2008-11-25
Supplement: 1752-0509-2-101-S4.pdf [file 1752-0509-2-101-S4.pdf]

| Gene Name | Amplicon Length | Direction          | Sequence (5'-3')                                            |
|-----------|-----------------|--------------------|-------------------------------------------------------------|
| gpdh      | 708             | Forward<br>Reverse | CCATGGTTAAAACAATACCAGGATGTACTG<br>GATAGCGATGGCATTGGCTTAA    |
| Cbl -L    | 291             | Forward<br>Reverse | TTGGATGAGGACATCGTTGA<br>ATAGAGCAGTGGCTGCGATT                |
| Argk      | 757             | Forward<br>Reverse | TTCAAGAAGACCGACAAGCACCC<br>CATCGTACATCTCCTTGACGGCC          |
| Tsf1      | 753             | Forward<br>Reverse | TGGCGGAGGAACCCATTTATC<br>CGAAATTCTCCGGATTGCC                |
| fh        | 749             | Forward<br>Reverse | CTAAAAAATGTTTGCCGGTCGTTTG<br>GCTTCACAGCTCCAGGGAAGTATAAGTATA |
| Reg-3     | 734             | Forward<br>Reverse | TGGTGCCACCAAGCAGACGAA<br>ATCATGGCCGGTGGACAGGAGT             |
| PGRP-SB1  | 542             | Forward<br>Reverse | CACATCAACGGCAATTAGTTTTGTG<br>TCTTGATCTCGTTGTACAGAGCATCAC    |
| Ag5r2     | 765             | Forward<br>Reverse | TTGGGTGTTAATCGCAACAAAGG<br>GGATGTTGAGCAGAGGTTACCAAATC       |
| CG10659   | 603             | Forward<br>Reverse | AAAGACGGCATTACCATAAGGACCA<br>AAAGATCGGTCGTCCTTGATCGT        |
